# Supplementary figures and images for: Pan-cancer association of a mitochondrial function score with genomic alterations and clinical outcome
Source: PubMed Central journal article supplement — Sci Rep. 2024 Dec 28;14:31430. doi: 10.1038/s41598-024-83022-1 (PMC11682264; doi:10.1038/s41598-024-83022-1), 2024-12-28

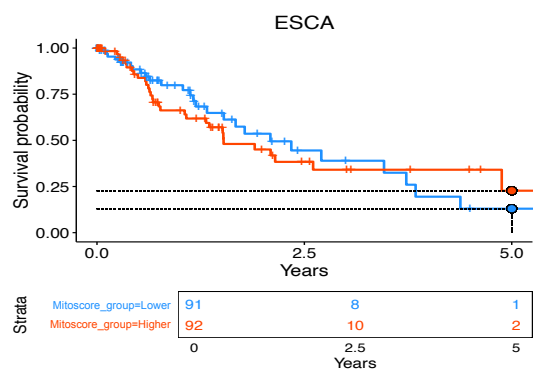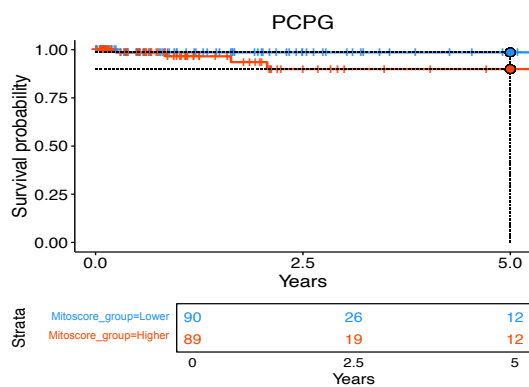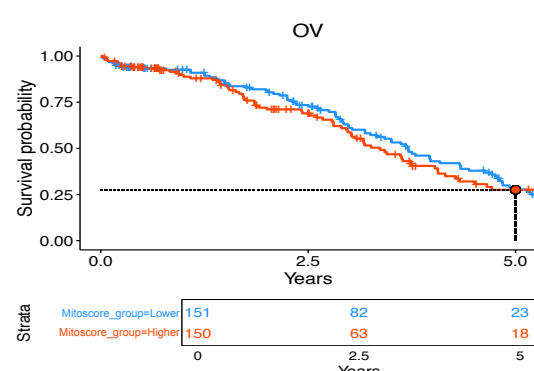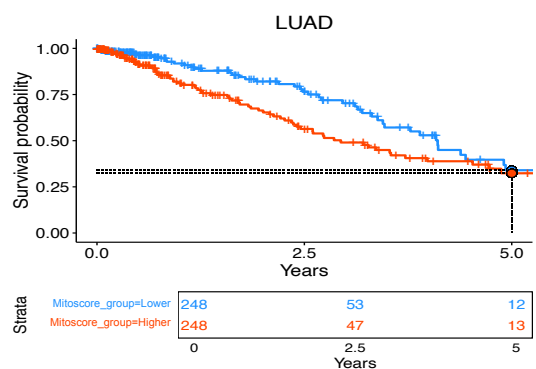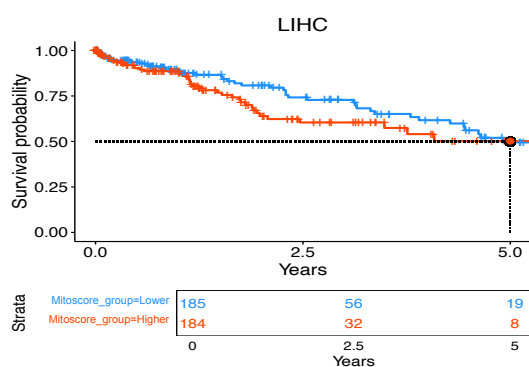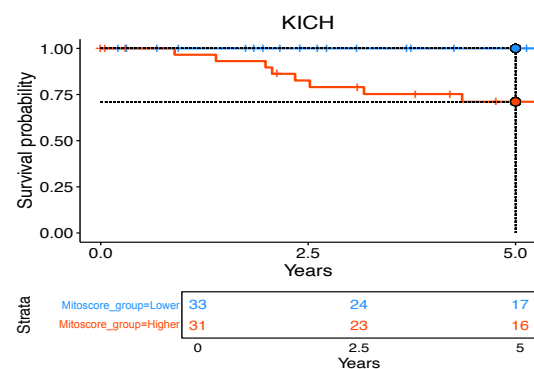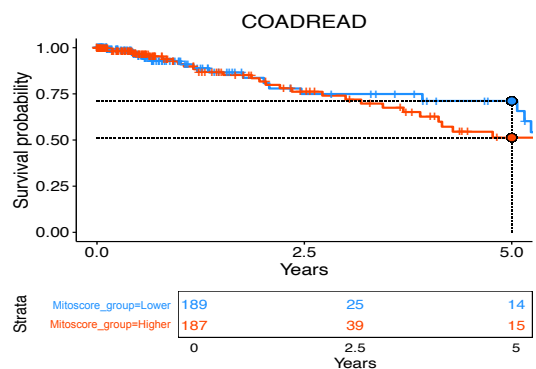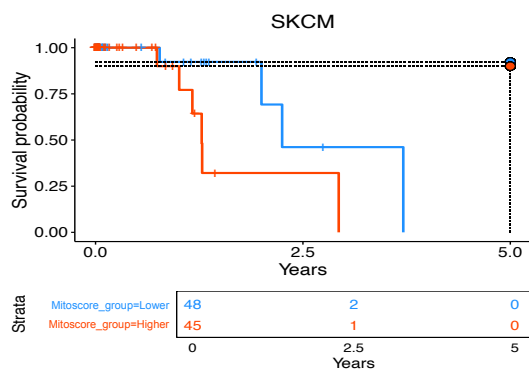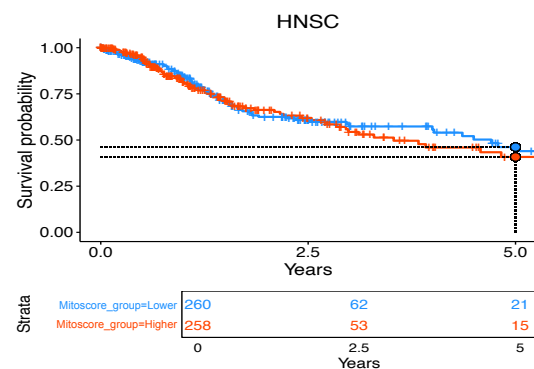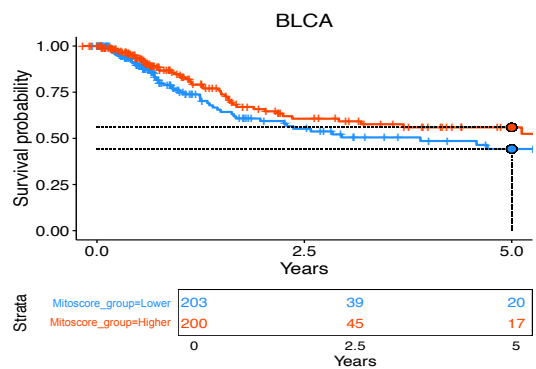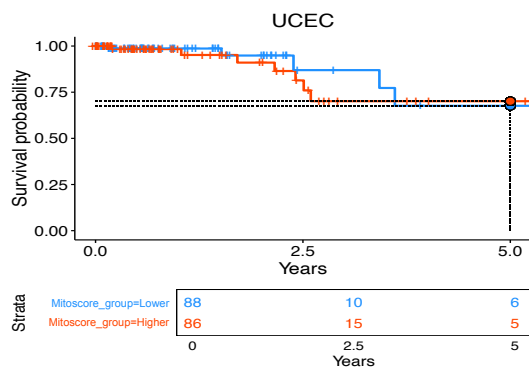

Supplement: 41598_2024_83022_MOESM1_ESM.pdf [file 41598_2024_83022_MOESM1_ESM.pdf]
